# Supplementary material
Source: PubMed Central journal article supplement (PMC4174314)

## Supplementary webappendix

This webappendix formed part of the original submission and has been peer reviewed. We post it as supplied by the authors.

Supplement to: Gray GE, Moodie Z, Metch B, et al, on behalf of the HVTN 503/Phambili study team. Recombinant adenovirus type 5 HIV gag/pol/nef vaccine in South Africa: unblinded, long-term follow-up of the phase 2b HVTN 503/Phambili study. *Lancet Infect Dis* 2014; published online Feb 20. [http://dx.doi.org/10.1016/S1473-3099\(14\)70020-9](http://dx.doi.org/10.1016/S1473-3099(14)70020-9).

**Supplemental Table 1: Description of the MITT cohort baseline characteristics stratified by gender**

|                                               | Men (N=441)        |                    | Women (N=359)      |                    | Total<br>(N=800) |
|-----------------------------------------------|--------------------|--------------------|--------------------|--------------------|------------------|
|                                               | Vaccine<br>(N=222) | Placebo<br>(N=219) | Vaccine<br>(N=178) | Placebo<br>(N=181) |                  |
| <b>Baseline Adenovirus 5 status</b>           |                    |                    |                    |                    |                  |
| Seronegative                                  | 50 (22.5%)         | 48 (21.9%)         | 25 (14.0%)         | 31 (17.0%)         | 154 (19.2%)      |
| Seropositive                                  | 172 (77.5%)        | 171 (78.1%)        | 153 (86.0%)        | 150 (82.9%)        | 646 (80.8%)      |
| <b>Age (years)</b>                            |                    |                    |                    |                    |                  |
| Median (range)                                | 22 (18,35)         | 22 (18,35)         | 23 (18, 35)        | 23 (18,34)         | 22 (18,35)       |
| <b>Race</b>                                   |                    |                    |                    |                    |                  |
| Black                                         | 222 (100.0%)       | 215 (98.2%)        | 176 (98.9%)        | 179 (98.9%)        | 792 (99.0%)      |
| Other                                         | 0 (0.0%)           | 4 (1.8%)           | 2 (1.1%)           | 2 (1.1%)           | 8 (1.0%)         |
| <b>HSV-2 status</b>                           |                    |                    |                    |                    |                  |
| Positive                                      | 40 (18.0%)         | 32 (14.7%)         | 90 (50.8%)         | 86 (47.5%)         | 248 (31.1%)      |
| Negative                                      | 177 (79.7%)        | 181 (83.0%)        | 84 (47.5%)         | 93 (51.4%)         | 535 (67.0%)      |
| Atypical                                      | 5 (2.3%)           | 5 (2.3%)           | 3 (1.7%)           | 2 (1.1%)           | 15 (1.9%)        |
| <b>Circumcised (men only)</b>                 |                    |                    |                    |                    |                  |
| At enrolment                                  | 61 (27.5%)         | 68 (31.1%)         | --                 | --                 | 129 (29.3%)      |
| During the study                              | 72 (32.4%)         | 67 (30.6%)         | --                 | --                 | 139 (31.5%)      |
| Uncircumcised throughout                      | 85 (38.3%)         | 80 (36.5%)         | --                 | --                 | 165 (37.4%)      |
| No on study assessment*                       | 4 (1.8%)           | 4 (1.8%)           | --                 | --                 | 8 (1.8%)         |
| <b>Risk behaviors (previous 6 months)</b>     |                    |                    |                    |                    |                  |
| <b>Number of sexual partners</b>              |                    |                    |                    |                    |                  |
| Median (range)                                | 2 (1, 20)          | 2 (1, 14)          | 1 (1,3)            | 1 (1,3)            | 1 (1,20)         |
| <b>Unprotected vaginal sex</b>                | 129 (58.1%)        | 125 (57.1%)        | 103 (57.9%)        | 96 (53.0%)         | 453 (56.6%)      |
| <b>Unprotected anal sex</b>                   | 4 (1.8%)           | 8 (3.7%)           | 4 (2.2%)           | 5 (2.8%)           | 21 (2.6%)        |
| <b>Drinking/drugs with sex</b>                | 93 (41.9%)         | 81 (37.0%)         | 26 (14.6%)         | 14 (7.7%)          | 214 (26.8%)      |
| <b>Had a main partner</b>                     | 155 (69.8%)        | 149 (68.0%)        | 151 (84.8%)        | 150 (82.9%)        | 605 (75.6%)      |
| <b>Had a main partner but apart regularly</b> | 97 (43.7%)         | 95 (43.4%)         | 83 (46.6%)         | 73 (40.3%)         | 348 (43.5%)      |
| <b>Had a casual or anonymous partner</b>      | 109 (49.1%)        | 100 (45.7%)        | 22 (12.4%)         | 18 (9.9%)          | 249 (31.1%)      |
| <b>Away from home regularly (men only)</b>    | 46 (20.7%)         | 48 (21.9%)         | --                 | --                 | 94 (21.3%)       |
| <b>Heavy drinking</b>                         | 49 (22.1%)         | 59 (26.9%)         | 7 (3.9%)           | 9 (5.0%)           | 124 (15.5%)      |
| <b>Smoked dagga (marijuana)</b>               | 77 (34.7%)         | 80 (36.5%)         | 8 (4.5%)           | 5 (2.8%)           | 170 (21.3%)      |

Behavioral risk data were based on self-reported behavior within 6 months prior to screening. Apart regularly from main partner was defined as living in a different location or partner regularly away from home for 3 or more days per week or for men, being away from home for 3 or more days per week. Heavy drinking was defined as having >5 drinks per day on at least 10 days within the six month reporting period. \*Men with no on study assessment have missing data for circumcision as status was determined by physical exam.

**Supplemental Table 2: Men circumcised on study by site and treatment**

| <b>Site</b>      | <b>Total # (# infected)</b> | <b>Vaccine # (# infected)</b> | <b>Placebo # (# infected)</b> |
|------------------|-----------------------------|-------------------------------|-------------------------------|
| <b>All</b>       | 139 (5)                     | 72 (3)                        | 67 (2)                        |
| <b>Soweto</b>    | 67 (1)                      | 33 (1)                        | 34 (0)                        |
| <b>Cape Town</b> | 6 (0)                       | 5 (0)                         | 1 (0)                         |
| <b>KOSH</b>      | 43 (1)                      | 22 (0)                        | 21 (1)                        |
| <b>eThekweni</b> | 22 (1)                      | 11 (2)                        | 11 (1)                        |
| <b>MEDUNSA</b>   | 1 (0)                       | 1 (0)                         | 0 (0)                         |

**Supplemental Table 3. Annualized dropout rates by treatment arm**

| Cohort           | MITT Cohort               |                            | Vaccine                   |                            | Placebo                   |                            |
|------------------|---------------------------|----------------------------|---------------------------|----------------------------|---------------------------|----------------------------|
|                  | # Dropout<br>(# enrolled) | Annualized<br>Dropout Rate | # Dropout<br>(# enrolled) | Annualized<br>Dropout Rate | # Dropout<br>(# enrolled) | Annualized<br>Dropout Rate |
| <b>Overall</b>   | 189 (800)                 | 8.3%                       | 88 (400)                  | 7.7%                       | 101 (400)                 | 8.8%                       |
| <b>Men</b>       | 124 (441)                 | 9.7%                       | 55 (222)                  | 8.5%                       | 69 (219)                  | 10.9%                      |
| <b>Women</b>     | 65 (359)                  | 6.4%                       | 33 (178)                  | 6.7%                       | 32 (181)                  | 6.2%                       |
| <b>Soweto</b>    | 43 (308)                  | 4.6%                       | 23 (154)                  | 5.1%                       | 20 (154)                  | 4.1%                       |
| <b>Cape Town</b> | 50 (165)                  | 11.4%                      | 21 (84)                   | 9.3%                       | 29 (81)                   | 13.7%                      |
| <b>KOSH</b>      | 74 (221)                  | 12.2%                      | 36 (110)                  | 11.8%                      | 38 (111)                  | 12.7%                      |
| <b>eThekwini</b> | 6 (53)                    | 4.0%                       | 2 (26)                    | 2.7%                       | 4 (27)                    | 5.2%                       |
| <b>MEDUNSA</b>   | 16 (53)                   | 10.3%                      | 6 (26)                    | 7.9%                       | 10 (27)                   | 12.7%                      |

Supplemental Figure 1. Kaplan-Meier curves of time to study dropout for vaccine and placebo groups

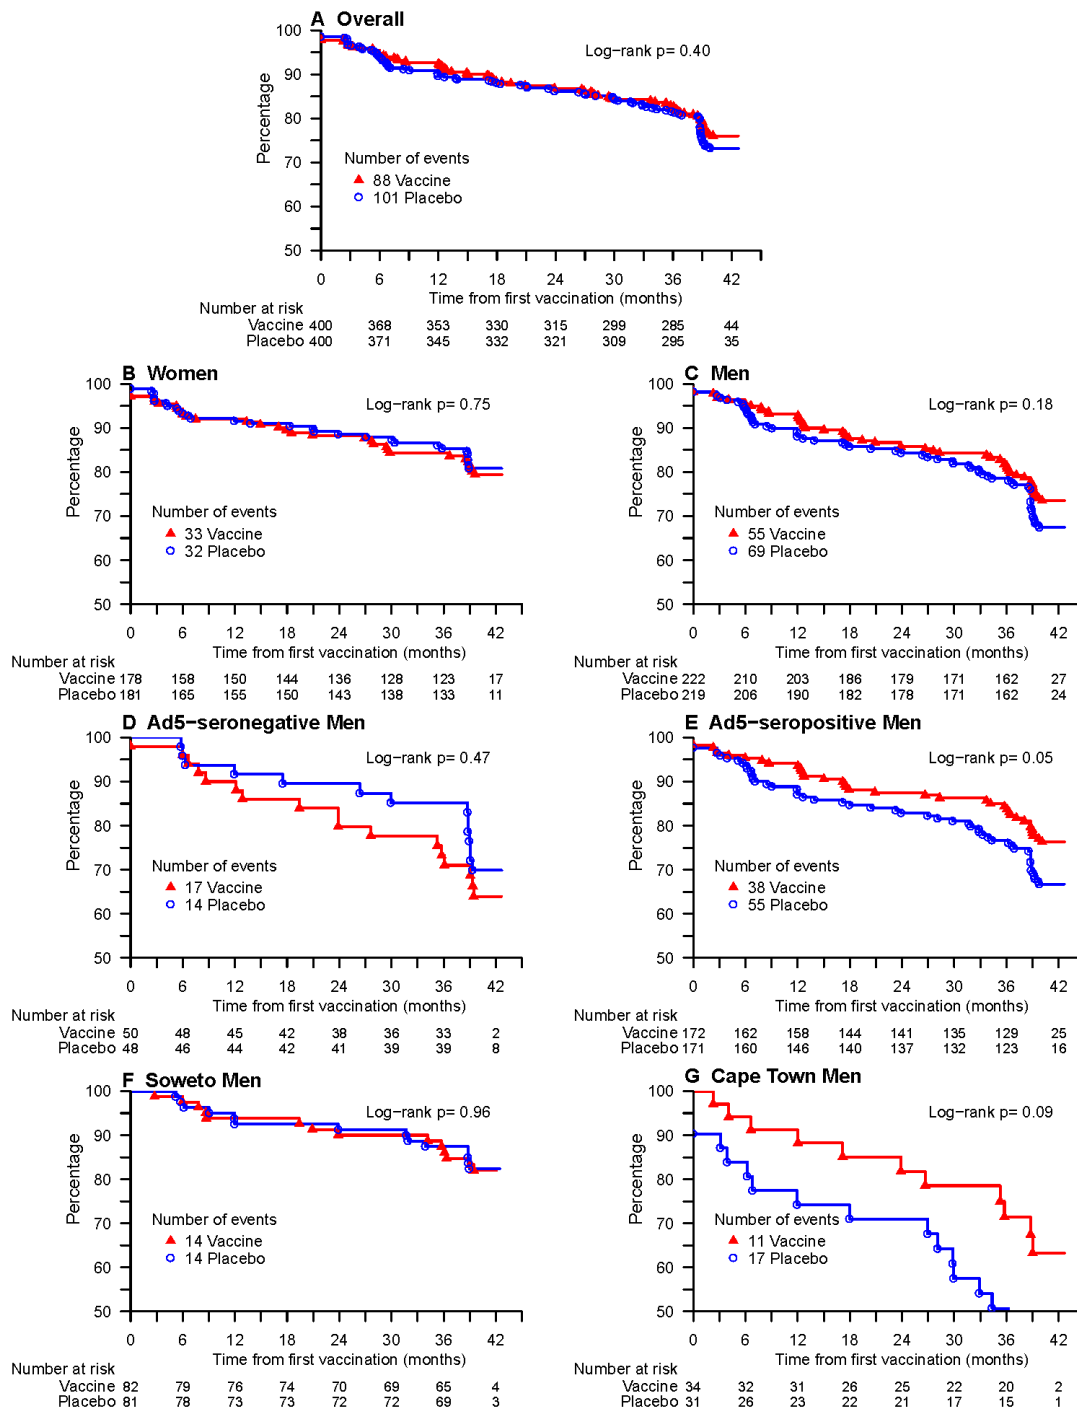

**Supplemental Figure 2. Plasma viral load set-point by treatment group**

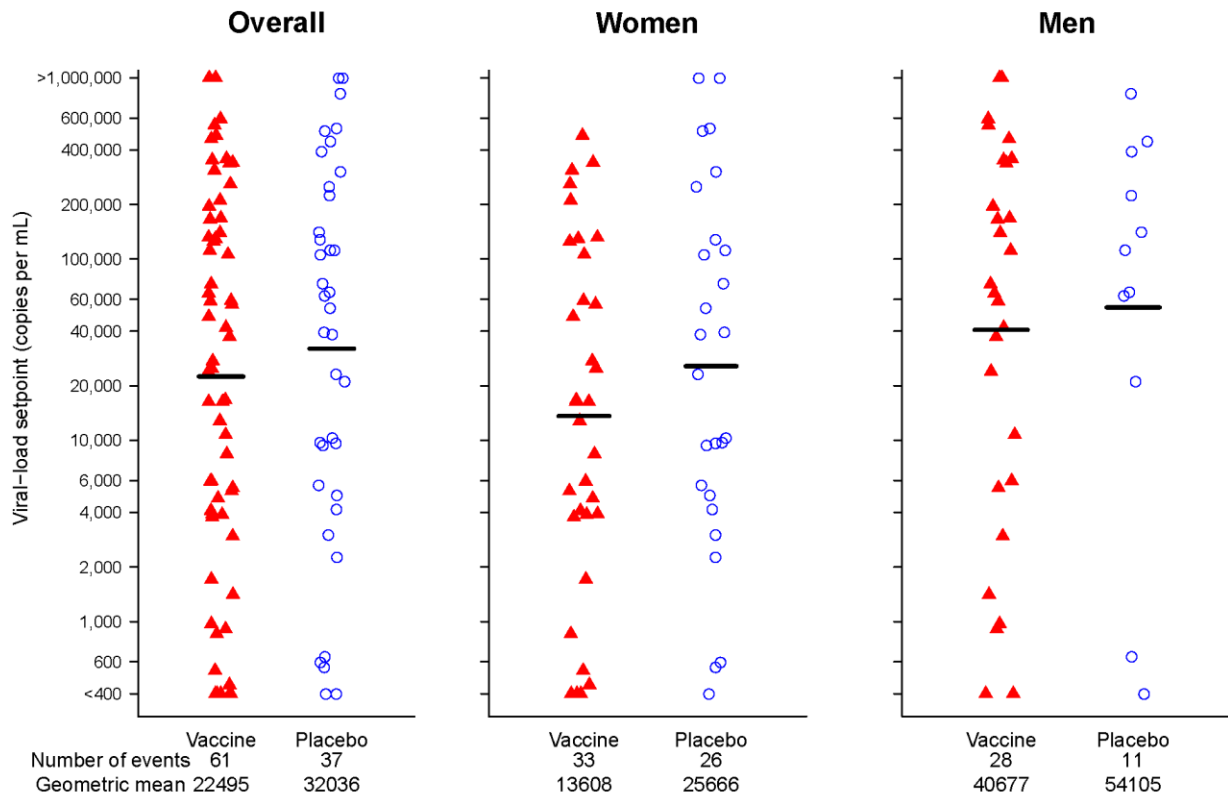

Viral load set-point is the geometric mean of the viral loads obtained at about 2 and 3 after detection of infection. The bar denotes the geometric mean titers of the plasma viral load. Two women in the vaccine group were excluded from the analysis: one because of a 6 month delay in confirming HIV infection and the other had no post diagnosis viral load measurements.

**Supplemental Figure 3. Cumulative HIV-1 incidence curves by number of vaccinations received prior to HIV-1 infection**

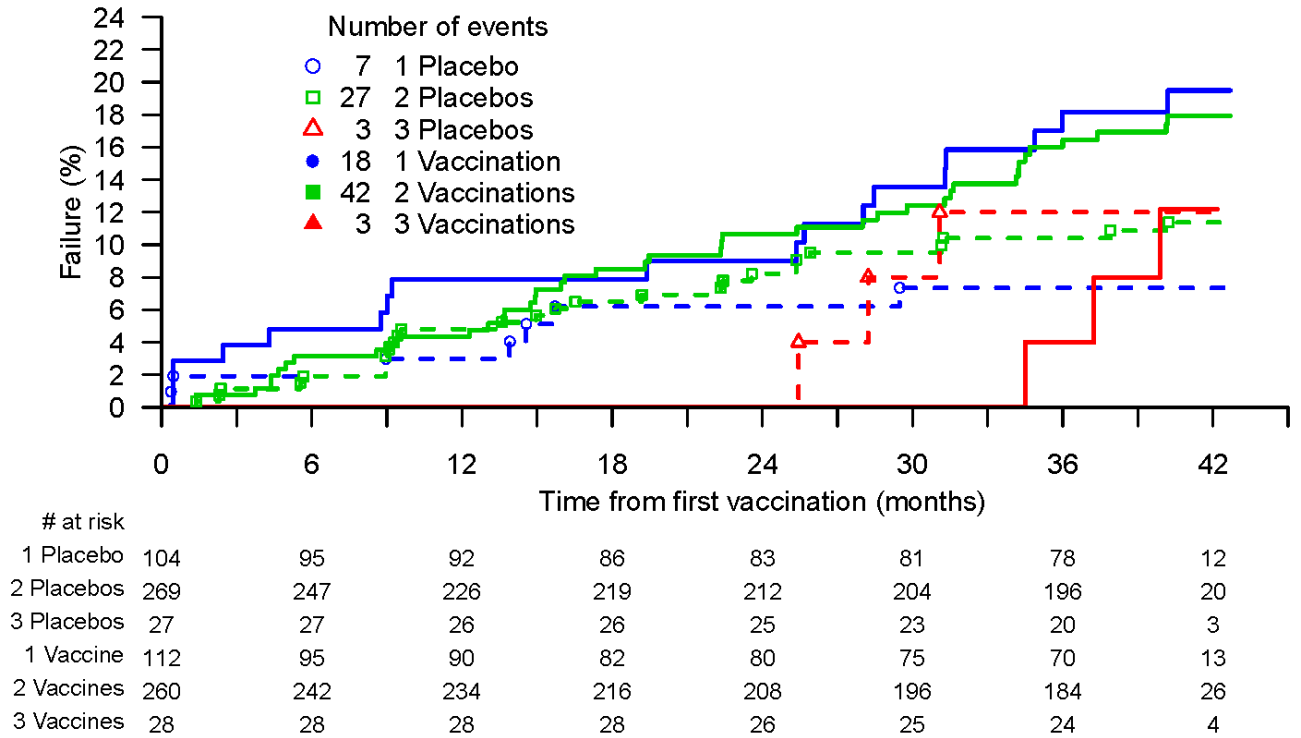

Supplement: NIHMS588579-supplement-01.pdf [file NIHMS588579-supplement-01.pdf]
